# Supplementary material
Source: Copernicus journal article supplement (doi:10.5194/acp-26-5531-2026)
Supplement: Supplementary file 1 [file acp-26-5531-2026-supplement.pdf]

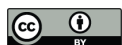

*Supplement of*

## **Global CO emissions and drivers of atmospheric CO trends constrained by MOPITT satellite measurements**

**Zhaojun Tang et al.**

*Correspondence to:* Zhe Jiang (zhejiang@tju.edu.cn)

The copyright of individual parts of the supplement might differ from the article licence.

## Supplemental Information

| Years | MOPITT Column + fixed OH (Tg/yr) |        |          |       |          |        | MOPITT Profile + fixed OH (Tg/yr) |        |          |       |          |        | MOPITT Column + Variable OH (Tg/yr) |        |          |       |          |        |
|-------|----------------------------------|--------|----------|-------|----------|--------|-----------------------------------|--------|----------|-------|----------|--------|-------------------------------------|--------|----------|-------|----------|--------|
|       | US                               | Europe | E. China | India | SE. Asia | Global | US                                | Europe | E. China | India | SE. Asia | Global | US                                  | Europe | E. China | India | SE. Asia | Global |
| 2003  | 88.1                             | 51.3   | 215.9    | 65.4  | 25.8     | 654.1  | 79.7                              | 47.4   | 205.3    | 64.1  | 25.5     | 612.2  | 82.6                                | 50.4   | 203.2    | 61.1  | 25.3     | 627.5  |
| 2004  | 81.5                             | 49.5   | 221.0    | 64.6  | 26.5     | 652.5  | 76.0                              | 46.0   | 212.9    | 64.7  | 26.1     | 617.3  | 77.3                                | 48.7   | 211.0    | 59.9  | 26.1     | 630.3  |
| 2005  | 77.7                             | 46.7   | 219.3    | 66.8  | 26.0     | 640.7  | 73.5                              | 43.6   | 212.5    | 65.7  | 26.1     | 611.3  | 73.3                                | 45.9   | 209.8    | 62.5  | 25.6     | 618.6  |
| 2006  | 78.5                             | 45.0   | 218.4    | 63.7  | 25.9     | 640.9  | 72.8                              | 42.1   | 212.4    | 64.8  | 26.1     | 609.0  | 73.7                                | 44.4   | 208.6    | 58.1  | 25.3     | 616.2  |
| 2007  | 75.8                             | 44.3   | 224.5    | 66.7  | 27.3     | 651.0  | 69.6                              | 40.7   | 212.7    | 65.9  | 26.7     | 609.0  | 71.6                                | 43.3   | 213.1    | 61.9  | 26.8     | 625.4  |
| 2008  | 70.6                             | 43.4   | 210.4    | 69.5  | 26.6     | 637.4  | 63.7                              | 39.6   | 196.0    | 66.7  | 25.9     | 587.5  | 66.3                                | 42.5   | 197.8    | 64.3  | 26.1     | 610.1  |
| 2009  | 62.4                             | 39.7   | 212.6    | 75.3  | 28.1     | 634.6  | 57.3                              | 36.5   | 195.6    | 69.8  | 27.0     | 580.5  | 59.0                                | 39.3   | 201.6    | 68.7  | 27.4     | 610.5  |
| 2010  | 61.7                             | 40.2   | 222.0    | 72.0  | 27.9     | 639.0  | 57.6                              | 37.6   | 199.5    | 69.0  | 27.8     | 586.4  | 58.7                                | 39.8   | 213.5    | 66.4  | 27.3     | 617.6  |
| 2011  | 62.9                             | 38.5   | 216.3    | 70.7  | 27.1     | 630.7  | 57.3                              | 35.5   | 196.1    | 68.7  | 27.0     | 577.8  | 59.0                                | 37.9   | 206.9    | 64.9  | 26.6     | 607.9  |
| 2012  | 65.2                             | 37.5   | 216.4    | 81.0  | 27.4     | 647.0  | 57.0                              | 33.8   | 195.6    | 74.3  | 27.1     | 583.7  | 60.4                                | 36.4   | 204.6    | 74.8  | 26.8     | 618.0  |
| 2013  | 59.3                             | 36.1   | 203.2    | 75.0  | 27.9     | 618.9  | 54.5                              | 33.4   | 189.4    | 71.6  | 27.6     | 572.0  | 55.7                                | 36.0   | 193.5    | 68.9  | 27.4     | 596.7  |
| 2014  | 57.0                             | 34.9   | 193.3    | 75.5  | 27.7     | 605.6  | 52.5                              | 32.5   | 184.1    | 72.4  | 27.4     | 562.5  | 54.1                                | 34.8   | 184.1    | 69.7  | 27.0     | 585.0  |
| 2015  | 54.4                             | 35.4   | 182.4    | 74.9  | 27.7     | 596.0  | 50.5                              | 32.7   | 175.5    | 71.3  | 27.4     | 553.8  | 51.6                                | 34.8   | 174.2    | 69.1  | 27.1     | 574.2  |
| 2016  | 50.3                             | 34.7   | 179.9    | 78.1  | 27.6     | 591.2  | 46.8                              | 32.3   | 174.7    | 71.4  | 27.7     | 549.0  | 47.2                                | 34.0   | 172.2    | 71.8  | 27.2     | 569.0  |
| 2017  | 50.4                             | 34.8   | 175.4    | 78.2  | 25.8     | 583.6  | 46.6                              | 32.6   | 175.4    | 73.0  | 26.7     | 549.9  | 47.1                                | 33.9   | 169.0    | 71.9  | 25.4     | 562.2  |
| 2018  | 48.6                             | 35.1   | 175.1    | 79.4  | 27.0     | 586.6  | 45.1                              | 32.3   | 174.6    | 73.7  | 27.1     | 547.8  | 46.0                                | 34.4   | 167.0    | 73.5  | 26.6     | 565.7  |
| 2019  | 46.4                             | 34.1   | 168.8    | 79.4  | 27.5     | 577.5  | 43.7                              | 32.1   | 169.9    | 74.8  | 27.3     | 544.6  | 44.5                                | 33.6   | 162.3    | 72.8  | 27.0     | 557.3  |
| 2020  | 48.4                             | 34.5   | 165.2    | 71.8  | 27.8     | 570.1  | 43.9                              | 32.0   | 167.8    | 69.6  | 27.5     | 537.9  | 45.9                                | 33.6   | 157.2    | 66.9  | 26.9     | 547.6  |
| 2021  | 48.2                             | 34.0   | 149.0    | 77.5  | 25.5     | 553.3  | 43.8                              | 31.7   | 158.5    | 72.7  | 26.3     | 525.9  | 47.6                                | 33.9   | 143.5    | 72.4  | 23.9     | 538.9  |
| 2022  | 45.3                             | 34.3   | 146.5    | 79.6  | 25.0     | 546.1  | 42.9                              | 32.1   | 157.2    | 73.8  | 26.3     | 525.4  | 42.8                                | 33.2   | 141.3    | 74.6  | 23.8     | 522.9  |

**Table S1.** Annual total anthropogenic CO emissions from 2003 to 2022, constrained with MOPITT column and profile data driven with the fixed and variable OH fields. The region definition is shown in Figure S1e.

| Years | MOPITT Column + fixed OH (Tg/yr) |             |            |        |          |           |        | MOPITT Profile + fixed OH (Tg/yr) |             |            |        |          |           |        | MOPITT Column + variable OH (Tg/yr) |             |            |        |          |           |        |
|-------|----------------------------------|-------------|------------|--------|----------|-----------|--------|-----------------------------------|-------------|------------|--------|----------|-----------|--------|-------------------------------------|-------------|------------|--------|----------|-----------|--------|
|       | Boreal N. America                | Boreal Asia | S. America | Africa | SE. Asia | Australia | Global | Boreal N. America                 | Boreal Asia | S. America | Africa | SE. Asia | Australia | Global | Boreal N. America                   | Boreal Asia | S. America | Africa | SE. Asia | Australia | Global |
| 2003  | 20.6                             | 70.6        | 42.7       | 158.6  | 13.0     | 16.6      | 365.6  | 17.2                              | 79.3        | 42.1       | 146.6  | 14.0     | 15.5      | 355.6  | 18.1                                | 69.2        | 39.5       | 152.9  | 13.3     | 16.2      | 351.2  |
| 2004  | 30.7                             | 19.3        | 60.8       | 160.3  | 26.0     | 19.3      | 356.2  | 30.3                              | 18.1        | 62.1       | 144.6  | 28.5     | 17.3      | 337.3  | 28.9                                | 19.8        | 55.0       | 155.7  | 25.9     | 18.9      | 342.3  |
| 2005  | 21.7                             | 24.6        | 63.5       | 178.3  | 18.1     | 8.7       | 357.8  | 18.9                              | 22.2        | 67.1       | 164.7  | 19.4     | 7.8       | 338.8  | 20.6                                | 22.1        | 57.3       | 171.4  | 17.8     | 8.3       | 338.9  |
| 2006  | 12.4                             | 35.3        | 34.3       | 149.3  | 27.3     | 19.9      | 319.3  | 12.0                              | 34.6        | 33.9       | 133.9  | 40.2     | 16.6      | 309.9  | 11.6                                | 34.5        | 31.4       | 144.0  | 26.2     | 18.6      | 305.7  |
| 2007  | 10.7                             | 27.7        | 68.6       | 166.6  | 15.2     | 16.7      | 361.7  | 10.3                              | 24.2        | 76.3       | 148.1  | 12.8     | 14.6      | 333.2  | 10.1                                | 26.6        | 64.3       | 159.8  | 14.7     | 16.2      | 346.0  |
| 2008  | 11.4                             | 41.8        | 25.4       | 175.6  | 8.5      | 9.0       | 312.1  | 10.1                              | 45.0        | 25.9       | 153.8  | 7.7      | 7.9       | 285.5  | 10.4                                | 41.1        | 22.8       | 168.8  | 8.3      | 8.7       | 298.6  |
| 2009  | 13.5                             | 23.8        | 13.2       | 151.9  | 44.4     | 16.8      | 309.7  | 11.6                              | 22.9        | 14.3       | 128.4  | 46.9     | 14.9      | 278.3  | 13.5                                | 23.1        | 11.6       | 148.0  | 43.4     | 16.3      | 301.0  |
| 2010  | 17.8                             | 29.8        | 65.7       | 165.4  | 13.6     | 5.0       | 349.0  | 17.5                              | 26.4        | 69.0       | 148.7  | 12.0     | 4.7       | 322.9  | 16.7                                | 29.3        | 58.7       | 159.0  | 13.2     | 4.9       | 332.0  |
| 2011  | 11.8                             | 35.3        | 18.3       | 171.3  | 14.5     | 29.0      | 312.5  | 12.7                              | 30.8        | 18.8       | 148.5  | 16.0     | 24.6      | 279.7  | 11.1                                | 33.5        | 16.6       | 164.3  | 14.1     | 28.2      | 298.6  |
| 2012  | 15.1                             | 73.9        | 35.0       | 168.2  | 16.2     | 28.2      | 376.0  | 13.0                              | 74.5        | 36.5       | 148.4  | 16.9     | 23.5      | 344.9  | 12.8                                | 65.3        | 32.8       | 160.7  | 16.0     | 27.1      | 352.3  |
| 2013  | 22.7                             | 39.6        | 14.8       | 170.4  | 15.4     | 11.3      | 310.9  | 24.1                              | 35.4        | 16.7       | 147.8  | 15.9     | 9.6       | 282.0  | 21.0                                | 35.3        | 13.2       | 164.6  | 14.8     | 11.1      | 295.6  |
| 2014  | 20.5                             | 42.2        | 25.2       | 156.5  | 26.8     | 16.5      | 330.0  | 20.0                              | 38.7        | 23.7       | 135.9  | 29.9     | 14.3      | 299.7  | 19.4                                | 40.7        | 21.2       | 146.1  | 25.8     | 16.2      | 310.1  |
| 2015  | 25.3                             | 40.7        | 37.1       | 169.4  | 34.6     | 13.0      | 362.1  | 27.1                              | 42.5        | 36.8       | 149.8  | 46.0     | 11.2      | 353.0  | 23.5                                | 39.7        | 33.7       | 164.0  | 34.4     | 12.6      | 348.7  |
| 2016  | 8.0                              | 56.7        | 30.1       | 188.7  | 13.7     | 7.8       | 341.6  | 9.0                               | 55.8        | 30.8       | 167.4  | 12.9     | 6.9       | 315.6  | 7.5                                 | 50.1        | 25.9       | 179.7  | 13.4     | 7.5       | 319.2  |
| 2017  | 22.8                             | 36.0        | 40.6       | 174.8  | 6.6      | 16.9      | 337.7  | 22.8                              | 33.9        | 38.3       | 156.0  | 6.6      | 14.3      | 308.4  | 20.9                                | 32.1        | 34.3       | 166.1  | 6.4      | 16.1      | 313.7  |
| 2018  | 26.7                             | 41.2        | 17.0       | 171.7  | 11.8     | 18.0      | 324.3  | 30.6                              | 40.9        | 18.4       | 151.3  | 13.0     | 15.1      | 303.3  | 22.3                                | 36.1        | 15.0       | 166.3  | 11.4     | 17.8      | 305.0  |
| 2019  | 20.5                             | 58.5        | 38.0       | 170.7  | 26.1     | 27.0      | 379.9  | 24.8                              | 55.6        | 35.0       | 148.1  | 29.9     | 34.6      | 364.4  | 17.9                                | 51.0        | 33.8       | 164.3  | 25.6     | 26.5      | 356.9  |
| 2020  | 1.5                              | 54.5        | 49.6       | 166.8  | 13.7     | 8.3       | 350.0  | 1.7                               | 53.6        | 51.7       | 154.7  | 11.9     | 7.8       | 338.6  | 9.5                                 | 37.4        | 36.7       | 152.1  | 18.6     | 15.3      | 306.4  |
| 2021  | 79.1                             | 129.1       | 31.8       | 177.9  | 9.9      | 7.1       | 477.9  | 91.9                              | 172.0       | 31.7       | 158.7  | 9.9      | 6.6       | 515.6  | 52.2                                | 102.6       | 26.7       | 154.5  | 17.0     | 14.7      | 401.4  |
| 2022  | 15.4                             | 26.9        | 36.5       | 157.8  | 4.2      | 6.5       | 277.4  | 19.0                              | 27.1        | 38.5       | 139.9  | 4.2      | 6.1       | 264.1  | 12.8                                | 31.1        | 35.5       | 147.4  | 19.3     | 15.2      | 291.4  |

**Table S2.** Annual total biomass burning CO emissions from 2003 to 2022, constrained with MOPITT column and profile data driven with the fixed and variable OH fields. The region definition is shown in Figure S1f.

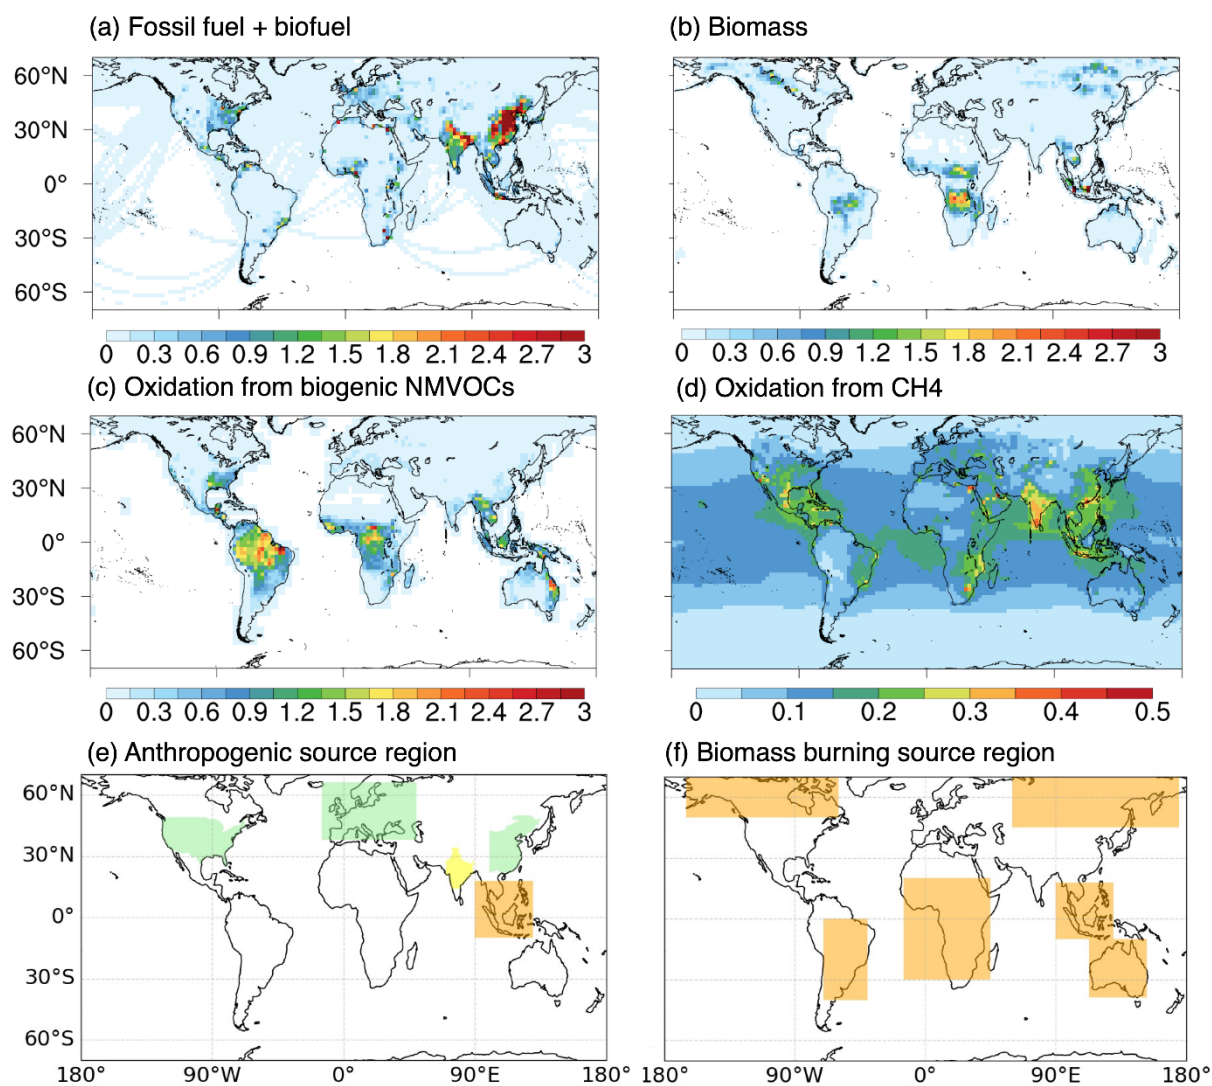

**Fig. S1.** (a-d) Mean a priori CO sources from 2003 to 2022 with unit  $10^{12}$  molec/cm<sup>2</sup>/sec; (e-f) Region definitions for (e) anthropogenic and (f) biomass burning sources. Since Eastern China, India, and Southeast Asia are geographically adjacent, different colors are used in Fig. S1e to distinguish these three regions.

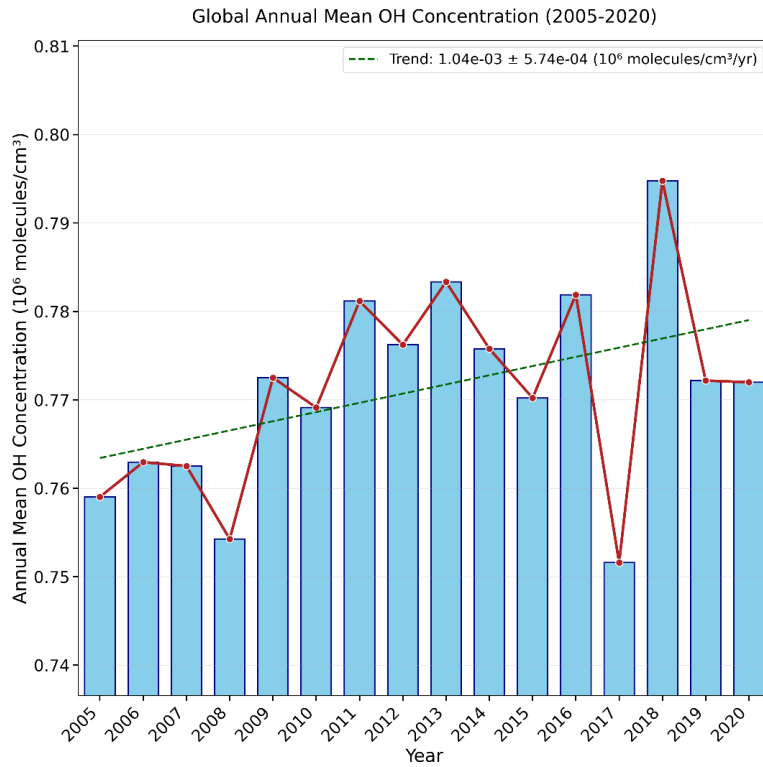

**Fig. S2.** Interannual variability of global mean tropospheric OH concentrations (2005-2020) from the TCR-2 tropospheric chemistry reanalysis.

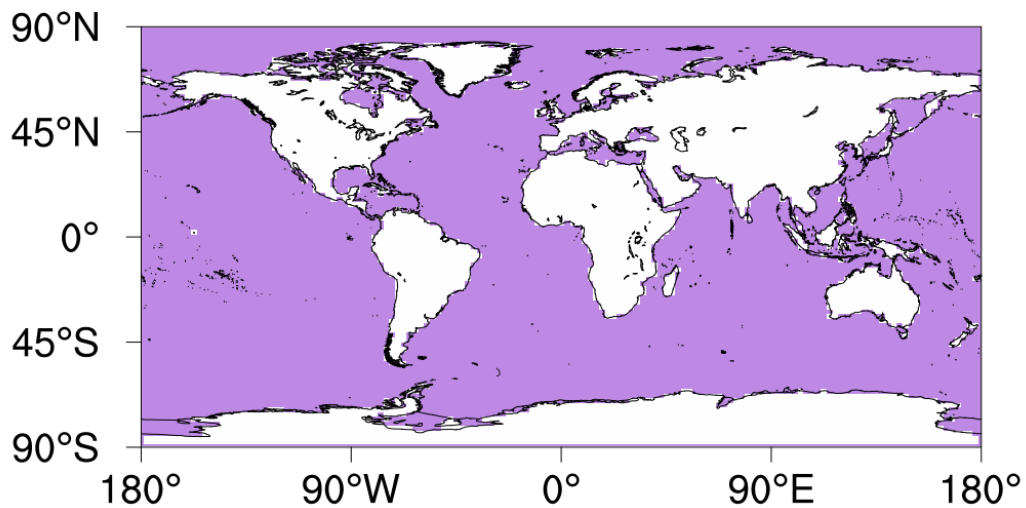

**Fig. S3.** Definition of the ocean boundary conditions. CO abundances over ocean (pink grids) were rewritten using the optimized hourly CO fields from Kalman Filter. The Kalman filter run is completely independent of the 4-DVAR inversions. There is no feedback of the 4-DVAR inversion results to the boundary conditions.

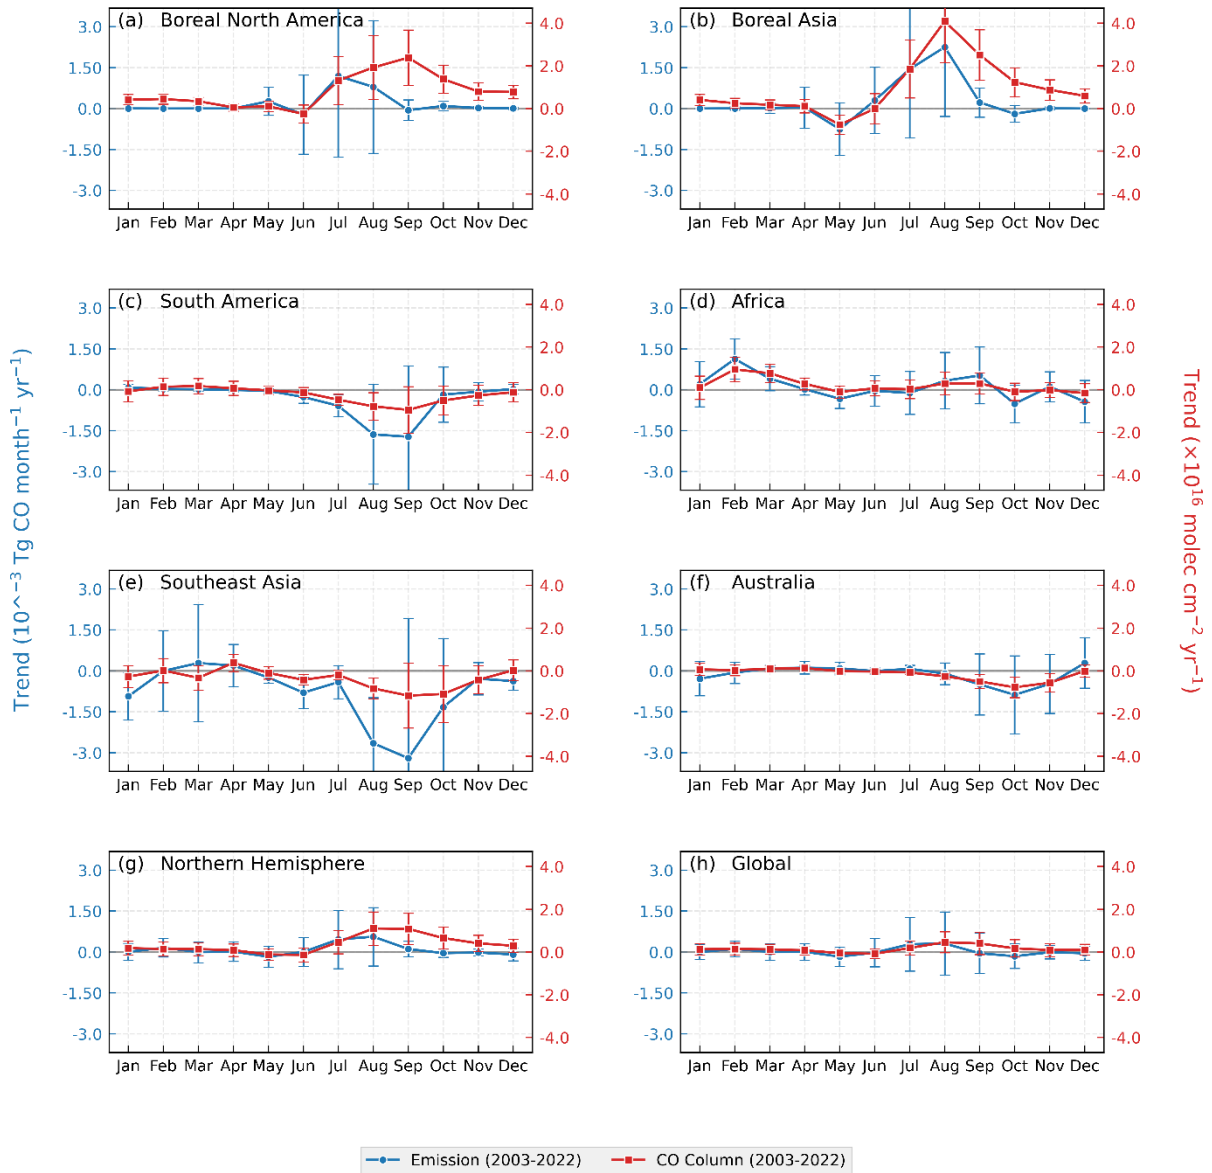

**Fig. S4.** Monthly trends in biomass burning CO emissions and in CO column concentrations attributable to biomass burning emission changes from 2003 to 2022, derived using the Column-FixOH method. Error bars indicate the standard deviation of the trends based on linear fitting.

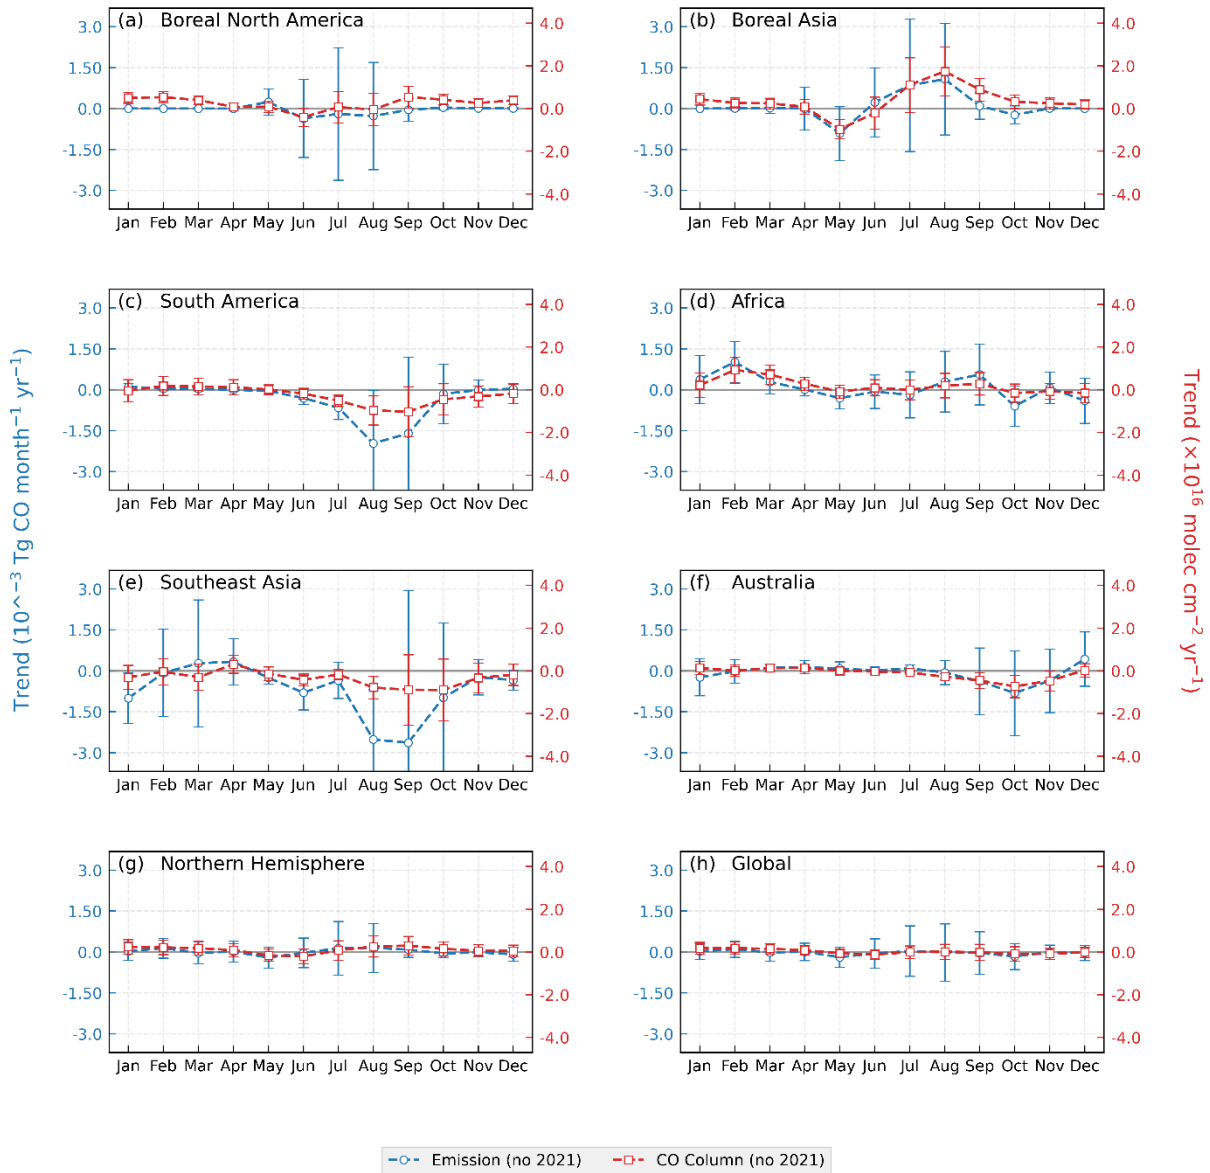

**Fig. S5.** Monthly trends in biomass burning CO emissions and in CO column concentrations attributable to biomass burning emission changes from 2003 to 2022, derived using the Column-FixOH method. Error bars indicate the standard deviation of the trends based on linear fitting. The year of 2021 was excluded from the trend calculation.
